# Supplementary material
Source: PubMed Central journal article supplement (PMC4603656)
Supplement: NIHMS266410-supplement-1.pdf [file NIHMS266410-supplement-1.pdf]

# Supporting Information for

## Chemistry of Nitrosyl Iron Complexes Supported by a $\beta$ - Diketiminato Ligand

*Zachary J. Tonzetch, Florent Héroguel, Loi H. Do, and Stephen J. Lippard\**

Department of Chemistry, Massachusetts Institute of Technology, Cambridge, MA 02139

Email: [lippard@mit.edu](mailto:lippard@mit.edu)

| CONTENTS                                                                               | PAGES     |
|----------------------------------------------------------------------------------------|-----------|
| Additional figures and spectra (Figures S1 – S15)                                      | S2 – S9   |
| Fully labeled thermal ellipsoid diagrams for <b>3</b> – <b>6</b> (Figures S16 – S19)   | S10 - S12 |
| Complete listing of bond distances and angles for <b>3</b> – <b>6</b> (Tables S1 – S4) | S13 – S21 |

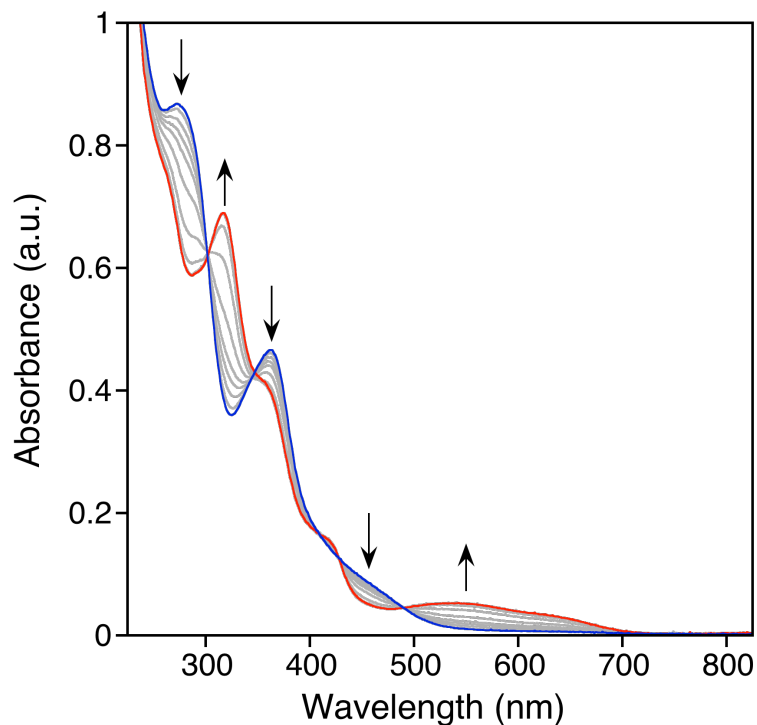

**Figure S1.** UV-vis spectroscopic changes associated with oxidation of **2** to **1** by air in THF at 25 °C.

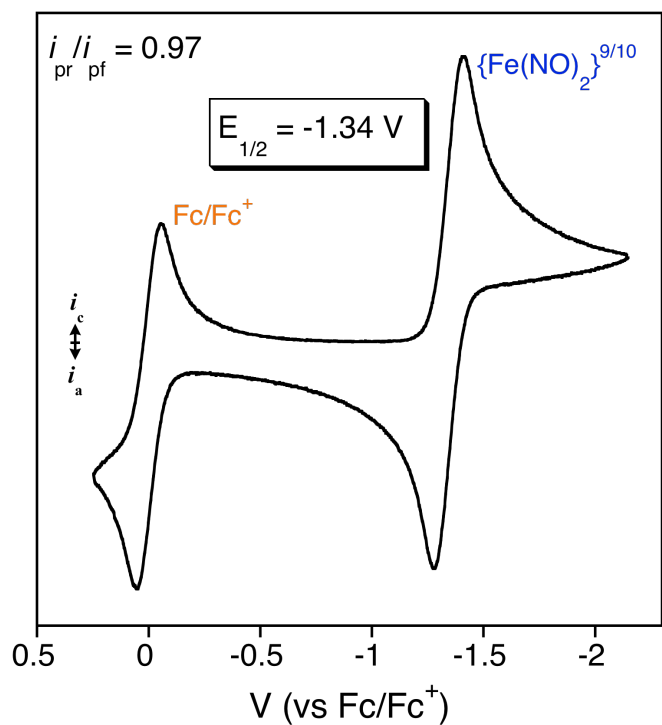

**Figure S2.** Cyclic voltammogram of compound **1** in THF at a glassy carbon electrode (0.1 M Bu<sub>4</sub>NBAr<sub>4</sub><sup>F</sup> supporting electrolyte).

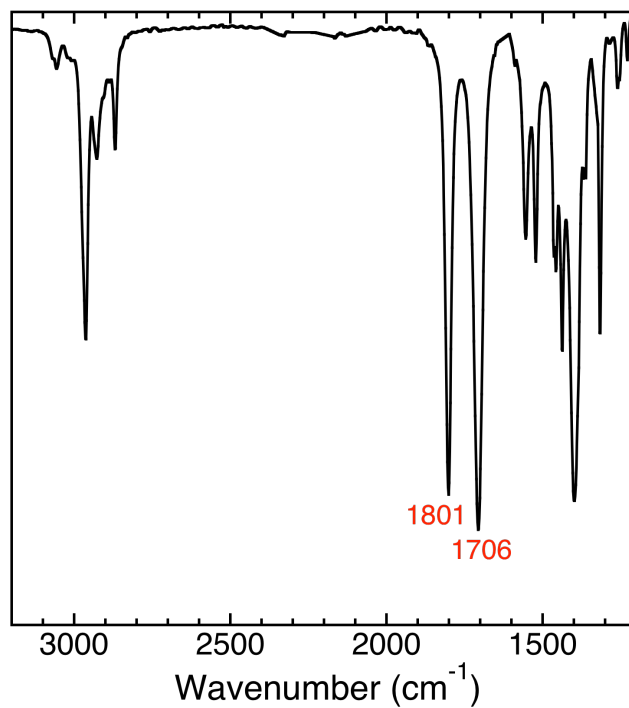

**Figure S3.** IR spectrum of compound **3** in benzene-*d*<sub>6</sub>.

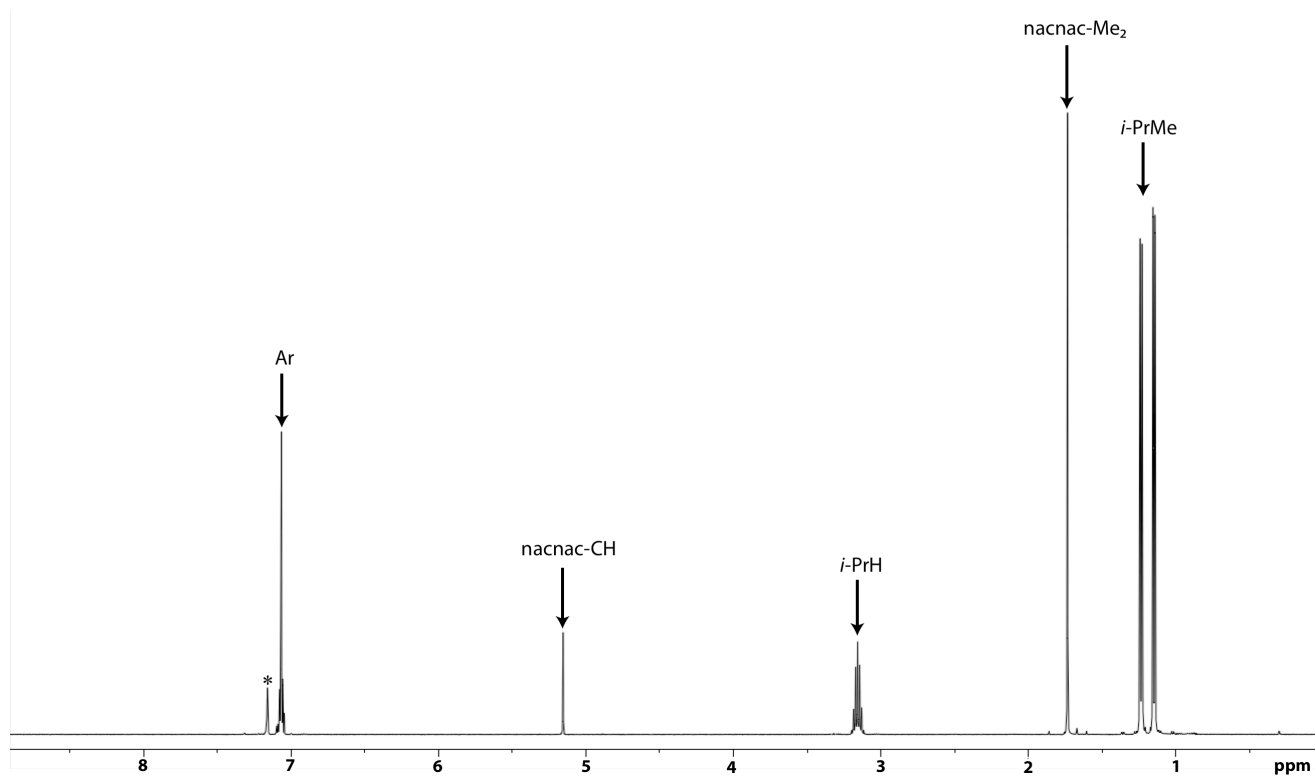

**Figure S4.** 500 MHz <sup>1</sup>H NMR spectrum of compound **3** in benzene-*d*<sub>6</sub>. The asterisk denotes a peak due to the NMR solvent.

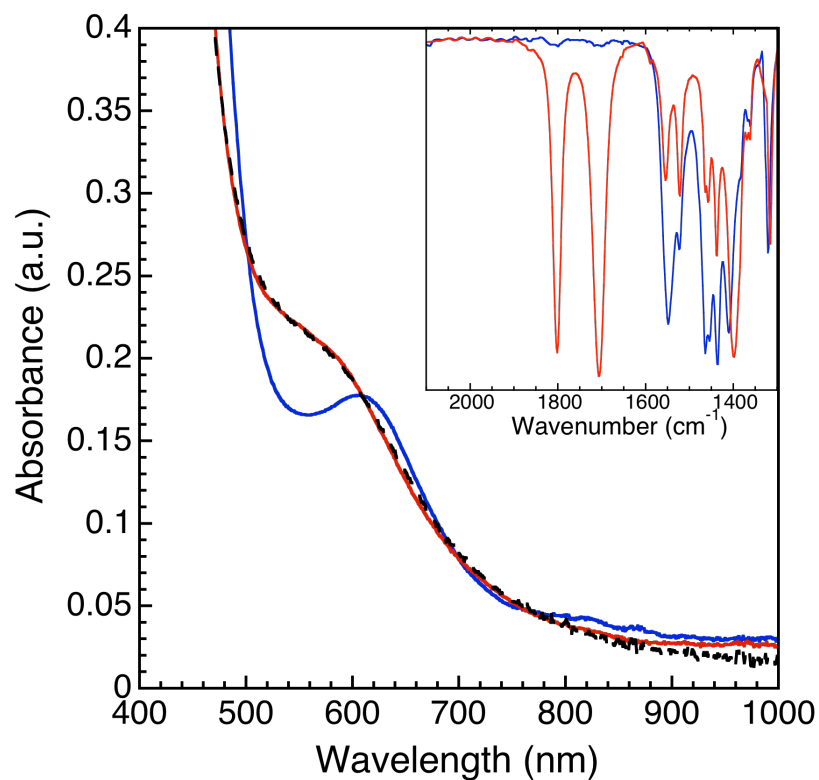

**Figure S5.** Electronic absorption spectrum of the reaction product of compound **3** and  $\text{KC}_8$  in benzene- $d_6$  (—); same product after exposure to air (—); authentic **3** (---). Inset displays the IR spectrum of compound **3** before (—) and after (—) treatment with  $\text{KC}_8$  in benzene- $d_6$ .

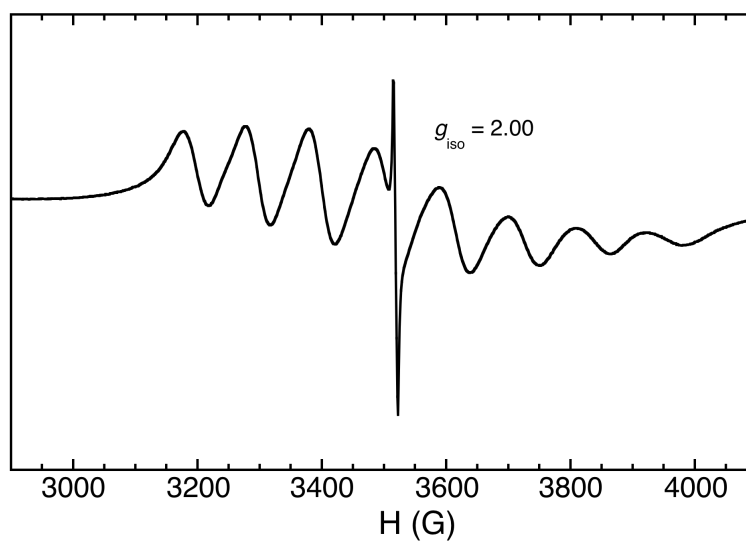

**Figure S6.** X-Band EPR spectrum (295 K) of the reaction product of compound **3** and  $\text{KC}_8$  in benzene- $d_6$ . The sharp peak corresponds to an unknown organic impurity.  $A_{\text{iso}}(^{59}\text{Co}) = 100 \text{ G}$ .

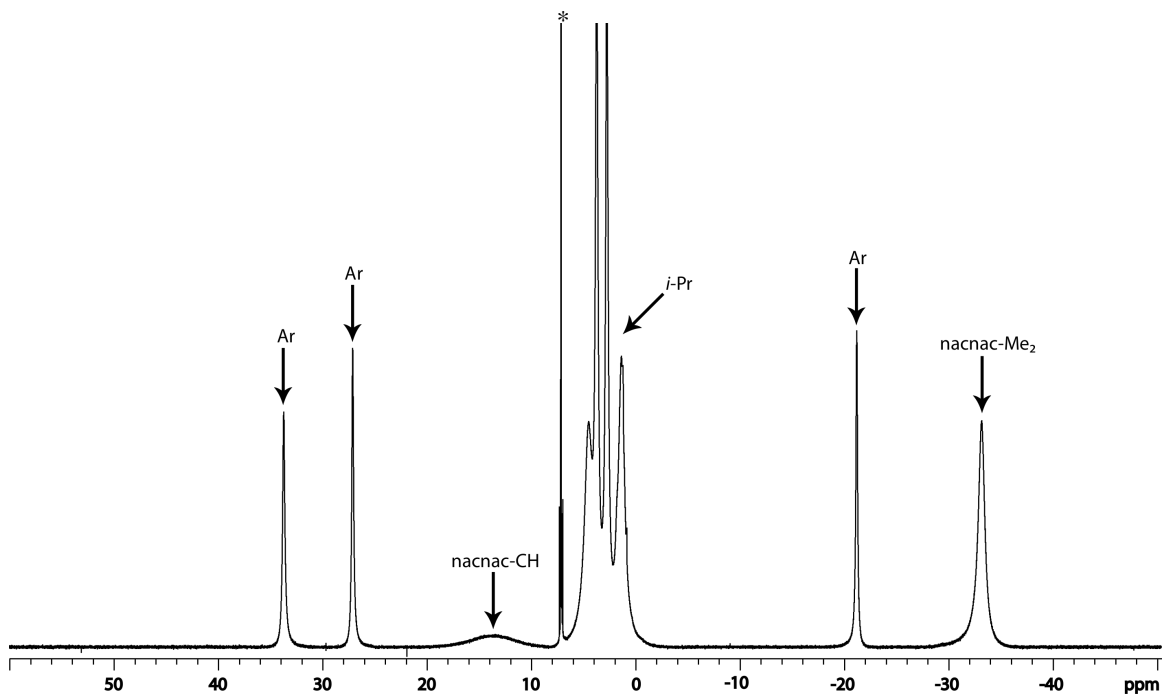

**Figure S7.** 500  $^1\text{H}$  NMR spectrum of compound **4** in benzene- $d_6$ . The asterisk denotes a peak due to the NMR solvent.

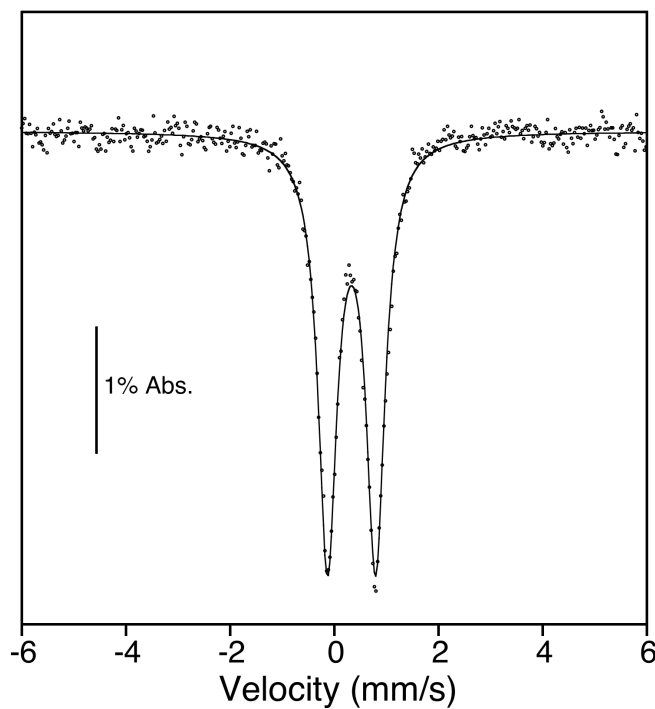

**Figure S8.** Zero-field  $^{57}\text{Fe}$  Mössbauer spectrum of polycrystalline **4** recorded at 90 K;  $\delta = 0.33(2)$  mm/s,  $\Delta E_Q = 0.92(2)$  mm/s,  $\Gamma = 0.44(2)$  mm/s.

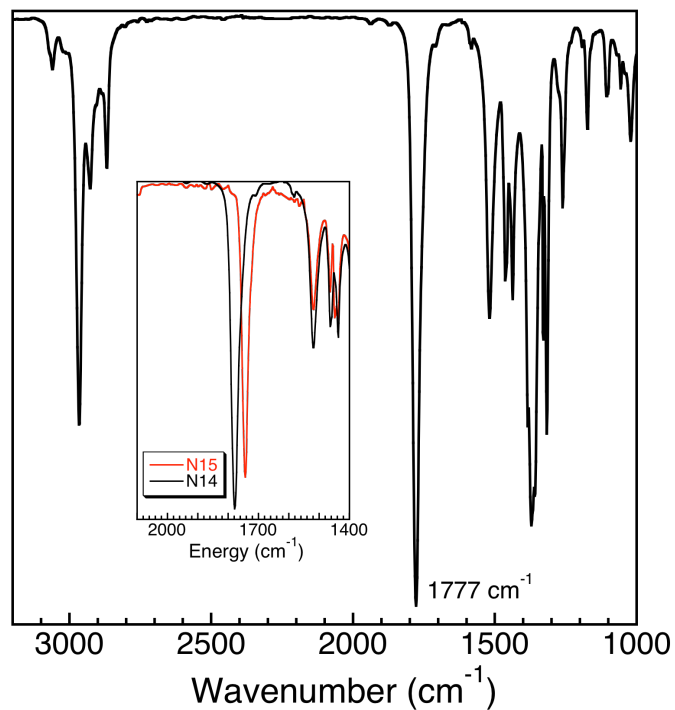

**Figure S9.** IR spectrum of compound **4** in benzene- $d_6$ . Inset shows an overlay of  $\nu_{\text{NO}}$  for the  $^{14}\text{N}$  and  $^{15}\text{N}$  isotopomers.

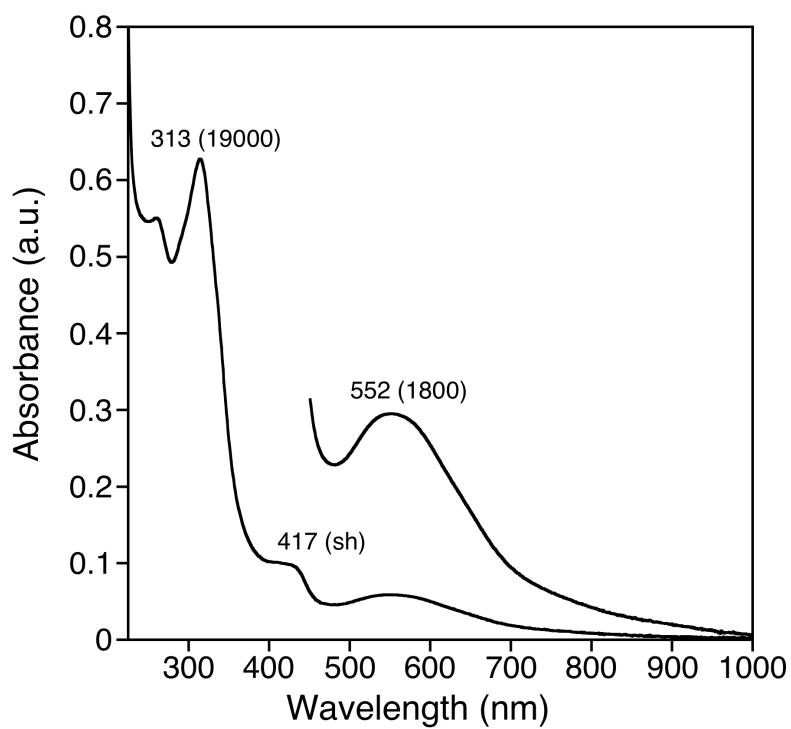

**Figure S10.** Electronic absorption spectrum of compound **4** in THF.

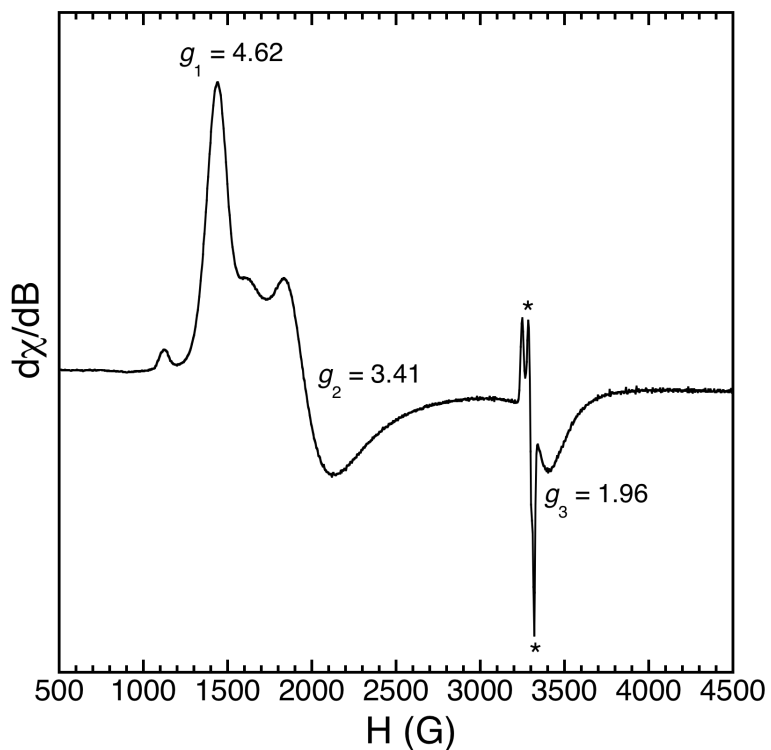

**Figure S11.** X-band EPR spectrum of compound **4** recorded in a 2-MeTHF glass at 77 K. Asterisks denote an impurity due to compound **1** (DNIC).

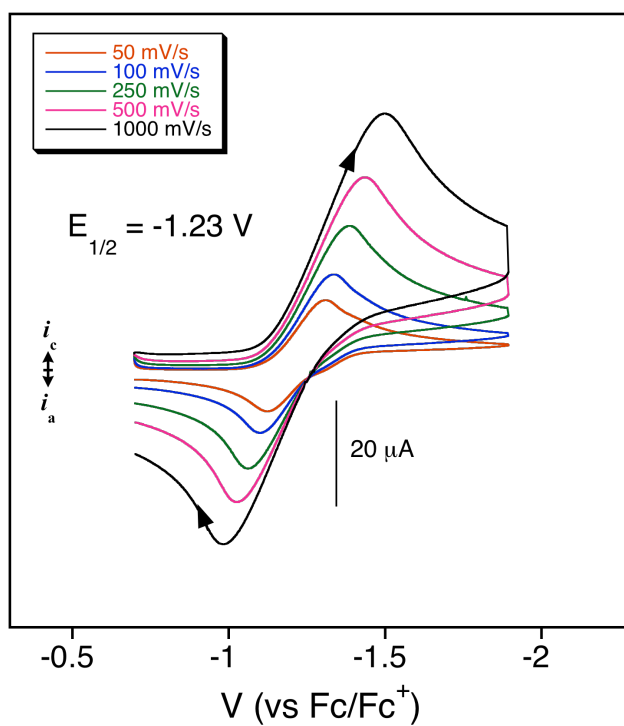

**Figure S12.** Cyclic voltammogram at various scan rates of compound **4** in THF at a glassy carbon electrode (0.1 M  $\text{Bu}_4\text{NPF}_6$  supporting electrolyte).

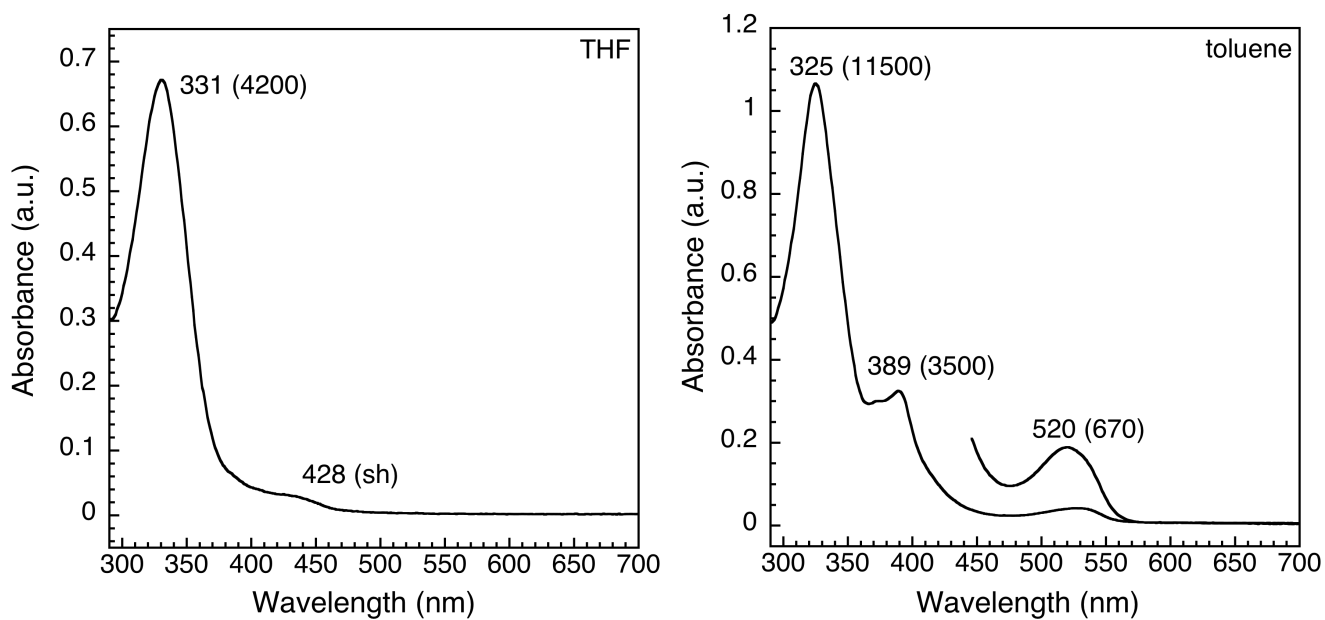

**Figure S13.** Electronic absorption spectra of compound **5** in THF (monomer) and toluene (dimer).

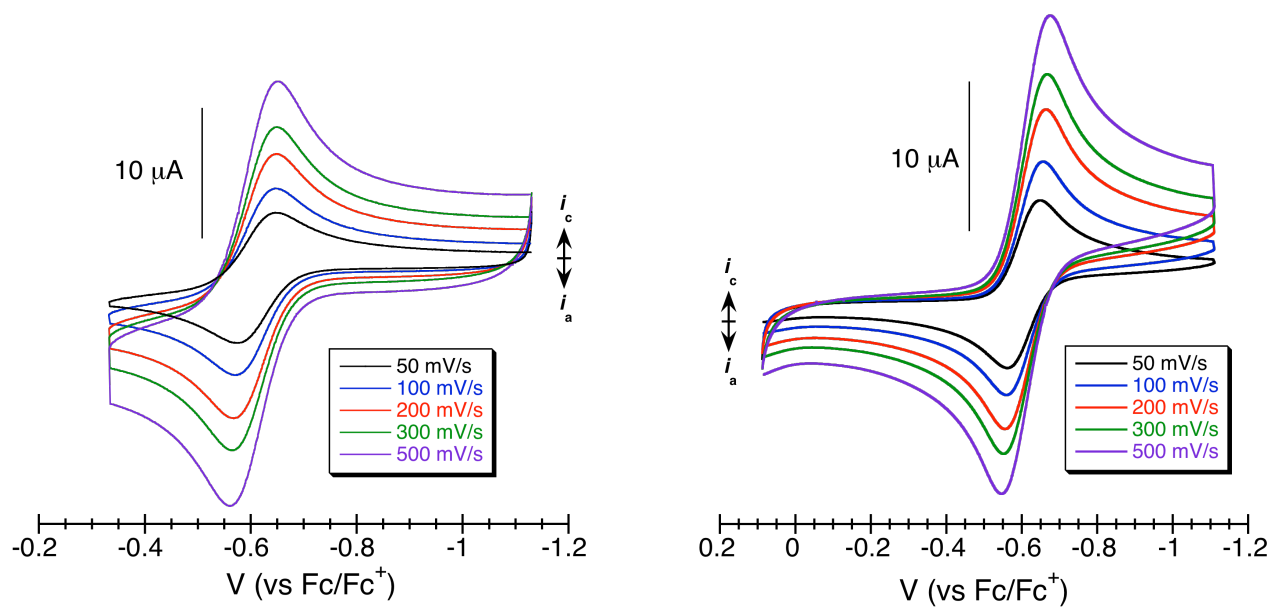

**Figure S14.** Cyclic voltammograms of compounds **5** (left) and **6** (right) in THF at a glassy carbon electrode (0.1 M  $\text{Bu}_4\text{NBAR}_4^{\text{F}}$  supporting electrolyte).



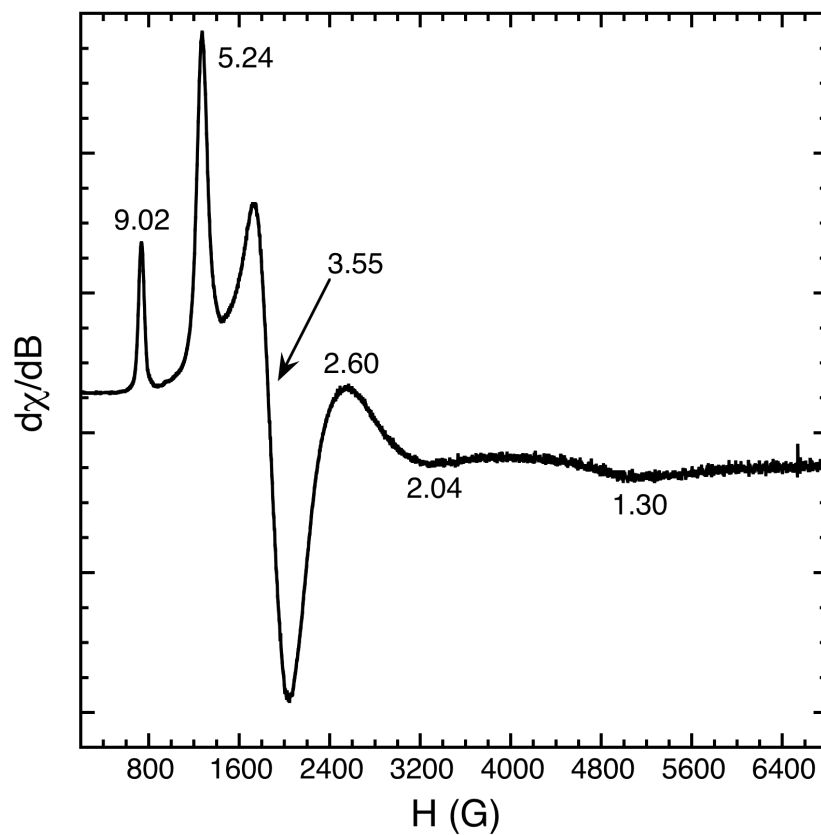

**Figure S15.** X-band EPR spectrum of compound **6** recorded in a 2-MeTHF glass at 77 K.

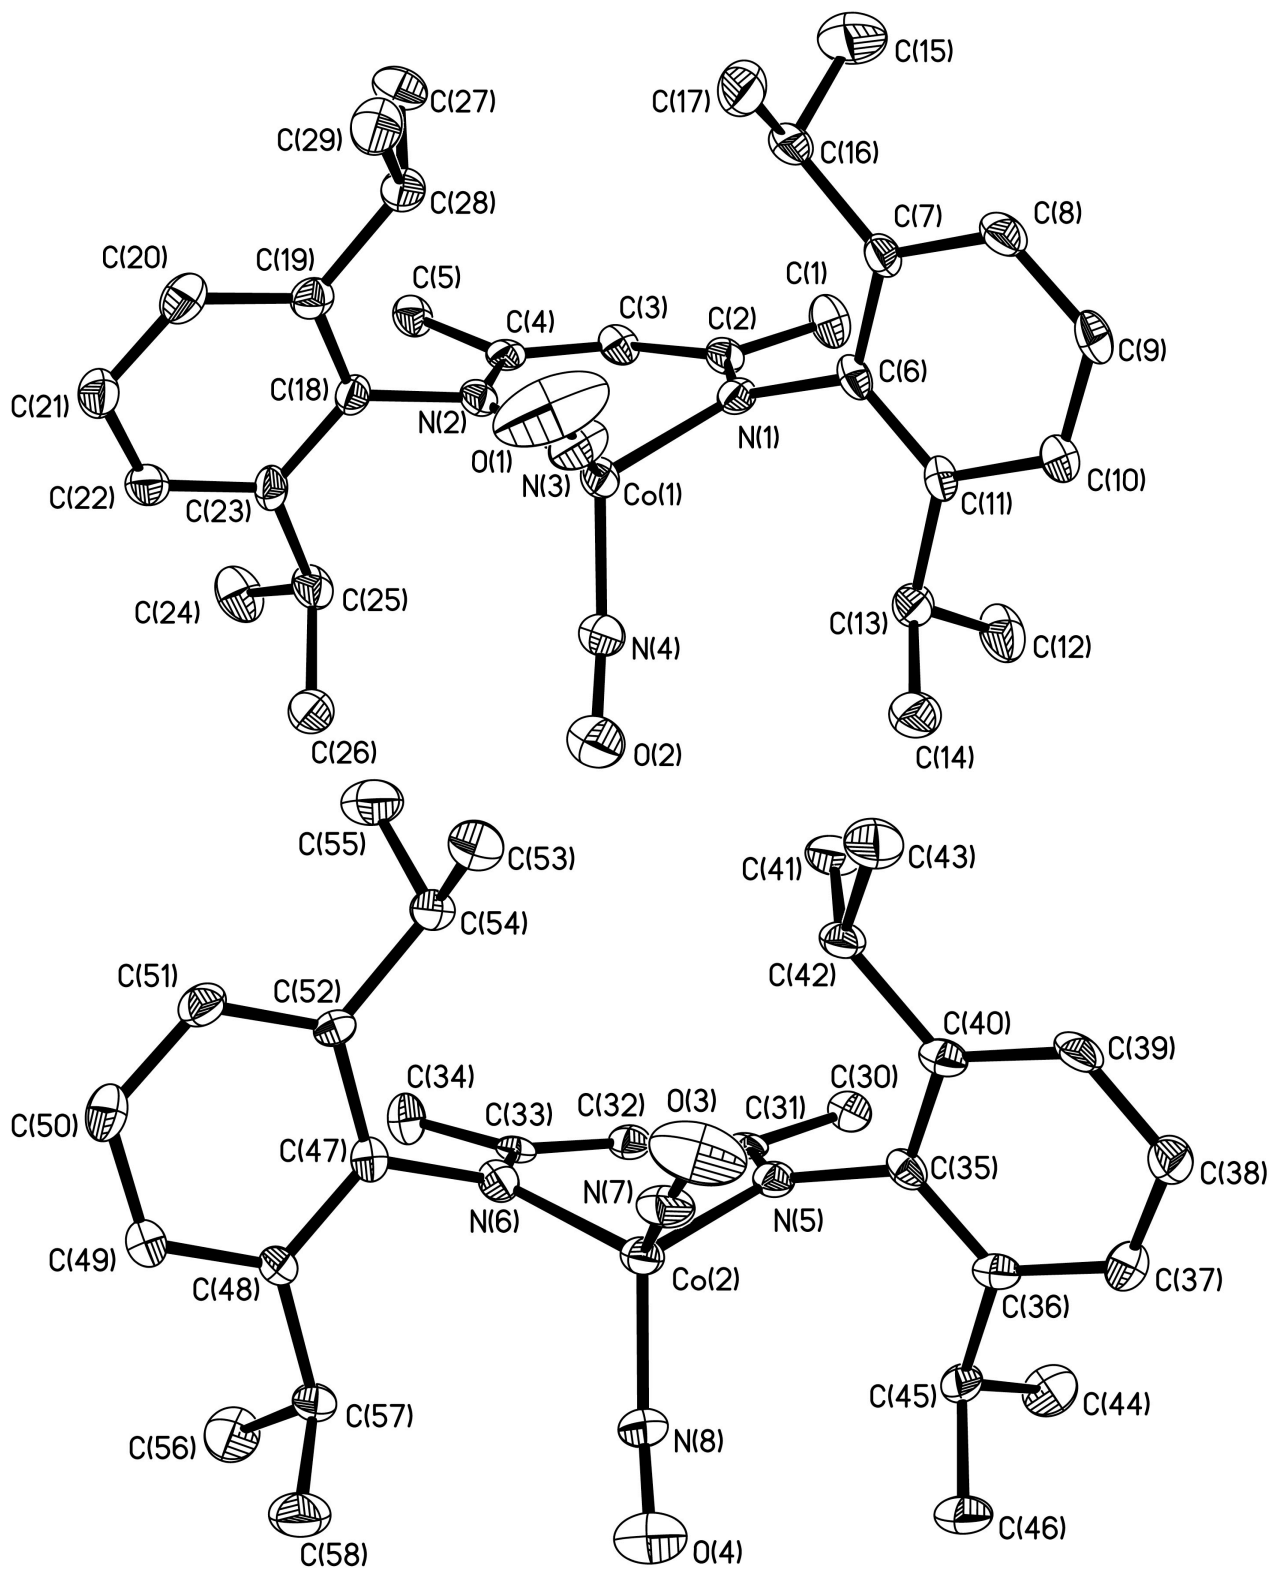

**Figure S16.** Fully labeled thermal ellipsoid (50%) drawings of the solid-state structure of compound **3** showing both crystallographically independent molecules from the asymmetric unit. Hydrogen atoms omitted for clarity.

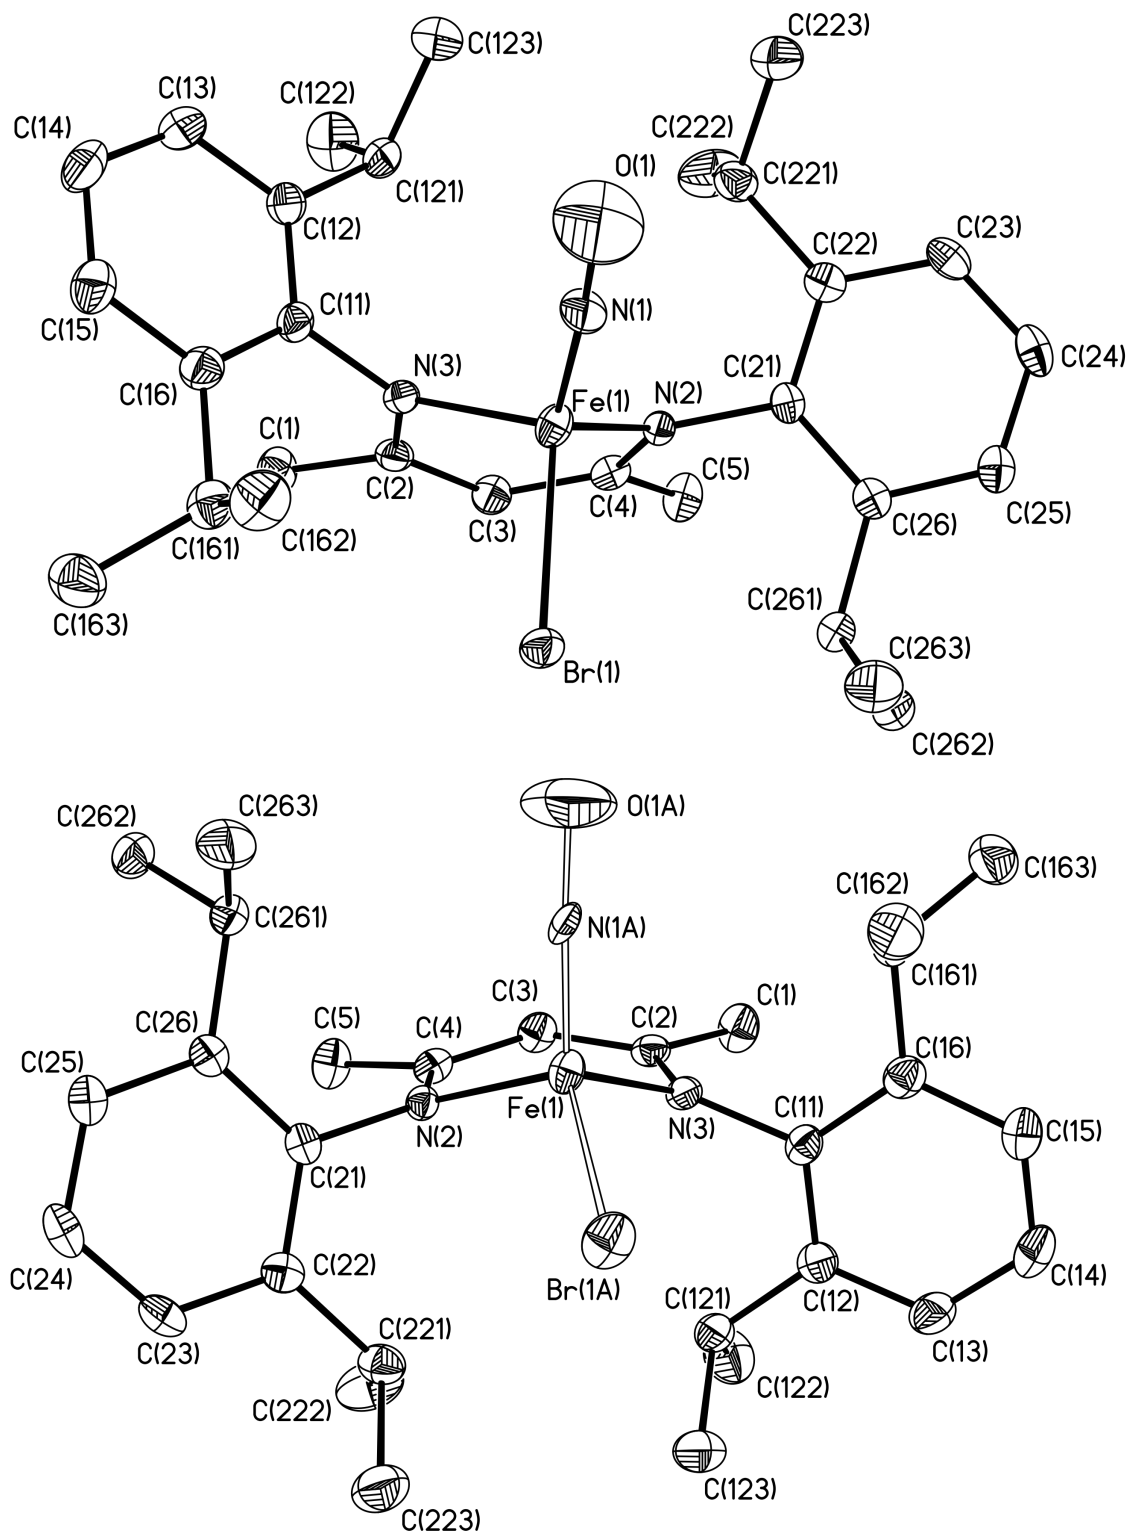

**Figure S17.** Fully labeled thermal ellipsoid (50%) drawing of the solid-state structure of compound **4** displaying both components of the disorder (major = upper; minor = lower). Hydrogen atoms omitted for clarity.

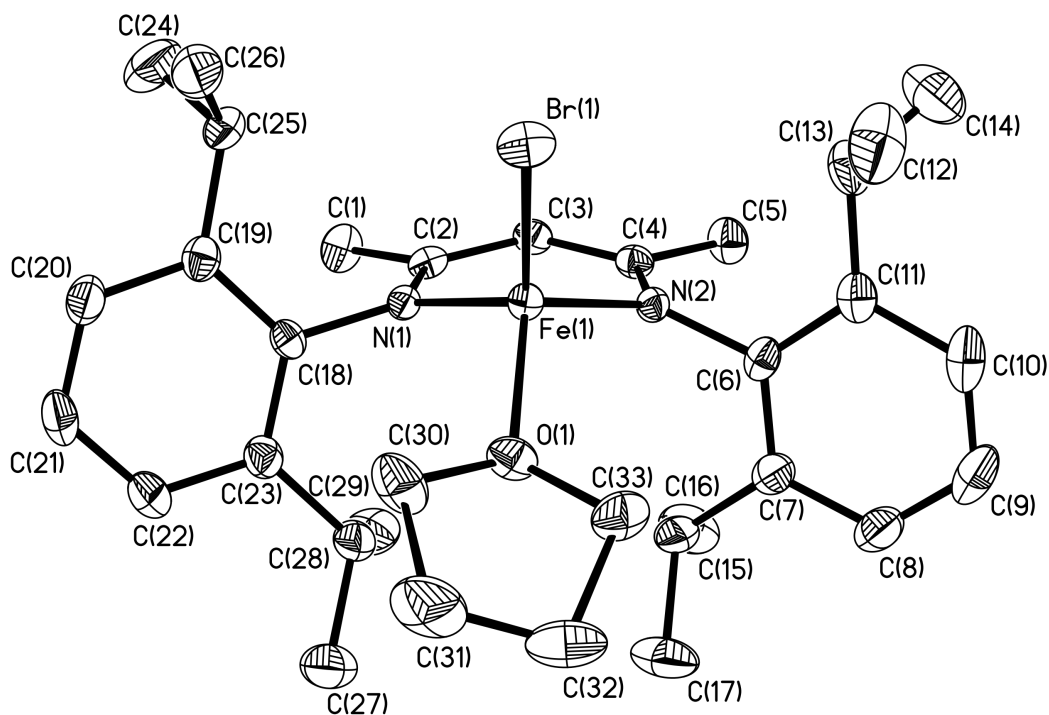

**Figure S18.** Fully labeled thermal ellipsoid (50%) drawing of the solid-state structure of compound **5**.  
Hydrogen atoms omitted for clarity.

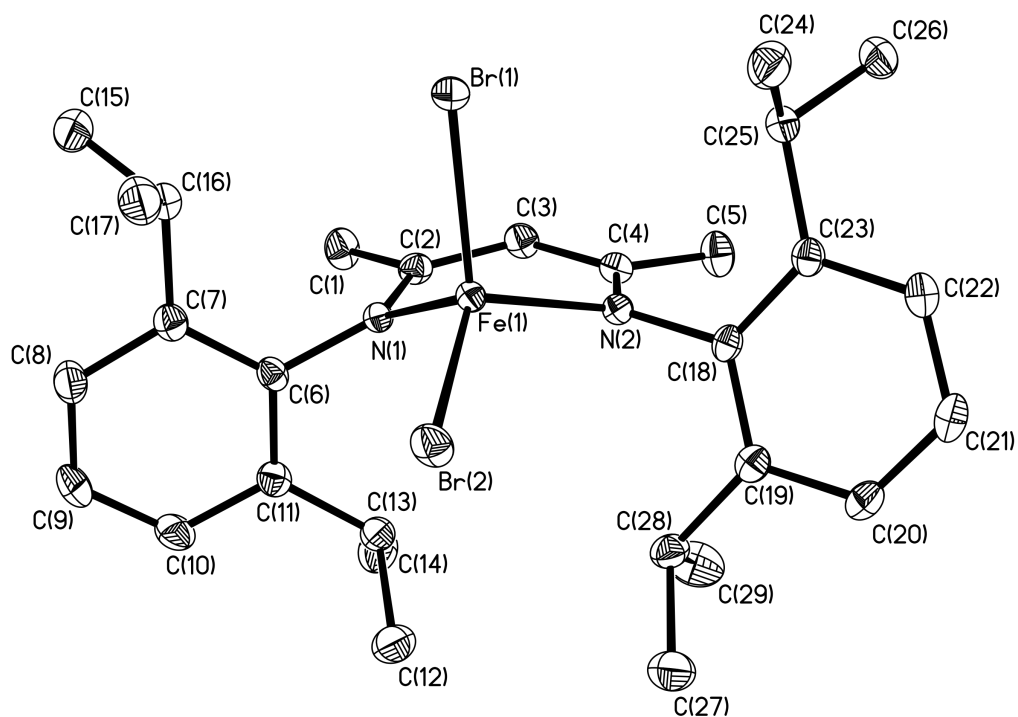

**Figure S19.** Fully labeled thermal ellipsoid (50%) drawing of the solid-state structure of compound **6**.  
Hydrogen atoms omitted for clarity.

**Table S1.** Bond lengths (Å) and angles (deg) for [Co(NO)<sub>2</sub>(Ar-nacnac)], **3**.

|             |          |             |          |
|-------------|----------|-------------|----------|
| Co(1)-N(3)  | 1.633(4) | C(11)-C(13) | 1.512(6) |
| Co(1)-N(4)  | 1.695(4) | C(12)-C(13) | 1.534(6) |
| Co(1)-N(1)  | 1.955(4) | C(13)-C(14) | 1.529(6) |
| Co(1)-N(2)  | 1.957(4) | C(15)-C(16) | 1.530(7) |
| O(1)-N(3)   | 1.165(5) | C(16)-C(17) | 1.527(7) |
| N(1)-C(2)   | 1.333(5) | C(18)-C(19) | 1.401(6) |
| N(1)-C(6)   | 1.442(5) | C(18)-C(23) | 1.416(6) |
| C(1)-C(2)   | 1.501(6) | C(19)-C(20) | 1.379(6) |
| C(2)-C(3)   | 1.397(6) | C(19)-C(28) | 1.520(6) |
| N(2)-C(4)   | 1.317(5) | C(20)-C(21) | 1.392(6) |
| N(2)-C(18)  | 1.437(5) | C(21)-C(22) | 1.373(6) |
| O(2)-N(4)   | 1.166(5) | C(22)-C(23) | 1.382(6) |
| Co(2)-N(7)  | 1.650(4) | C(23)-C(25) | 1.509(6) |
| Co(2)-N(8)  | 1.707(4) | C(24)-C(25) | 1.528(6) |
| Co(2)-N(5)  | 1.952(4) | C(25)-C(26) | 1.536(6) |
| Co(2)-N(6)  | 1.954(4) | C(27)-C(28) | 1.524(7) |
| C(3)-C(4)   | 1.400(6) | C(28)-C(29) | 1.532(6) |
| O(3)-N(7)   | 1.159(5) | C(30)-C(31) | 1.517(6) |
| C(4)-C(5)   | 1.516(6) | C(31)-C(32) | 1.392(6) |
| O(4)-N(8)   | 1.166(5) | C(32)-C(33) | 1.388(6) |
| N(5)-C(31)  | 1.323(5) | C(33)-C(34) | 1.505(6) |
| N(5)-C(35)  | 1.436(5) | C(35)-C(40) | 1.402(6) |
| C(6)-C(11)  | 1.407(6) | C(35)-C(36) | 1.408(6) |
| C(6)-C(7)   | 1.409(6) | C(36)-C(37) | 1.386(6) |
| N(6)-C(33)  | 1.331(5) | C(36)-C(45) | 1.510(6) |
| N(6)-C(47)  | 1.438(5) | C(37)-C(38) | 1.374(6) |
| C(7)-C(8)   | 1.389(6) | C(38)-C(39) | 1.376(6) |
| C(7)-C(16)  | 1.522(6) | C(39)-C(40) | 1.387(6) |
| C(8)-C(9)   | 1.381(6) | C(40)-C(42) | 1.528(6) |
| C(9)-C(10)  | 1.374(6) | C(41)-C(42) | 1.541(6) |
| C(10)-C(11) | 1.392(6) | C(42)-C(43) | 1.523(6) |

|                  |            |                   |            |
|------------------|------------|-------------------|------------|
| C(44)-C(45)      | 1.532(6)   | N(7)-Co(2)-N(6)   | 119.42(17) |
| C(45)-C(46)      | 1.533(6)   | N(8)-Co(2)-N(6)   | 110.84(17) |
| C(47)-C(48)      | 1.396(6)   | N(5)-Co(2)-N(6)   | 93.02(15)  |
| C(47)-C(52)      | 1.412(6)   | O(1)-N(3)-Co(1)   | 173.0(4)   |
| C(48)-C(49)      | 1.392(6)   | C(2)-C(3)-C(4)    | 127.2(4)   |
| C(48)-C(57)      | 1.518(6)   | O(2)-N(4)-Co(1)   | 150.1(4)   |
| C(49)-C(50)      | 1.375(6)   | N(2)-C(4)-C(3)    | 123.2(4)   |
| C(50)-C(51)      | 1.374(6)   | N(2)-C(4)-C(5)    | 120.2(4)   |
| C(51)-C(52)      | 1.388(6)   | C(3)-C(4)-C(5)    | 116.7(4)   |
| C(52)-C(54)      | 1.523(6)   | C(31)-N(5)-C(35)  | 120.6(4)   |
| C(53)-C(54)      | 1.530(7)   | C(31)-N(5)-Co(2)  | 124.3(3)   |
| C(54)-C(55)      | 1.529(6)   | C(35)-N(5)-Co(2)  | 115.1(3)   |
| C(56)-C(57)      | 1.533(6)   | C(11)-C(6)-C(7)   | 120.4(4)   |
| C(57)-C(58)      | 1.528(6)   | C(11)-C(6)-N(1)   | 120.7(4)   |
|                  |            | C(7)-C(6)-N(1)    | 118.7(4)   |
| N(3)-Co(1)-N(4)  | 110.5(2)   | C(33)-N(6)-C(47)  | 119.1(4)   |
| N(3)-Co(1)-N(1)  | 117.00(18) | C(33)-N(6)-Co(2)  | 123.0(3)   |
| N(4)-Co(1)-N(1)  | 111.65(17) | C(47)-N(6)-Co(2)  | 117.9(3)   |
| N(3)-Co(1)-N(2)  | 112.47(17) | C(8)-C(7)-C(6)    | 118.7(4)   |
| N(4)-Co(1)-N(2)  | 111.17(16) | C(8)-C(7)-C(16)   | 118.7(4)   |
| N(1)-Co(1)-N(2)  | 93.03(15)  | C(6)-C(7)-C(16)   | 122.6(4)   |
| C(2)-N(1)-C(6)   | 119.1(4)   | O(3)-N(7)-Co(2)   | 170.0(4)   |
| C(2)-N(1)-Co(1)  | 123.5(3)   | C(9)-C(8)-C(7)    | 121.2(4)   |
| C(6)-N(1)-Co(1)  | 117.4(3)   | O(4)-N(8)-Co(2)   | 148.0(4)   |
| N(1)-C(2)-C(3)   | 123.3(4)   | C(10)-C(9)-C(8)   | 119.7(4)   |
| N(1)-C(2)-C(1)   | 119.6(4)   | C(9)-C(10)-C(11)  | 121.7(4)   |
| C(3)-C(2)-C(1)   | 117.1(4)   | C(10)-C(11)-C(6)  | 118.2(4)   |
| C(4)-N(2)-C(18)  | 120.3(4)   | C(10)-C(11)-C(13) | 119.4(4)   |
| C(4)-N(2)-Co(1)  | 124.3(3)   | C(6)-C(11)-C(13)  | 122.4(4)   |
| C(18)-N(2)-Co(1) | 115.3(3)   | C(11)-C(13)-C(14) | 110.8(4)   |
| N(7)-Co(2)-N(8)  | 110.23(19) | C(11)-C(13)-C(12) | 111.8(4)   |
| N(7)-Co(2)-N(5)  | 111.35(17) | C(14)-C(13)-C(12) | 110.4(4)   |
| N(8)-Co(2)-N(5)  | 110.80(17) | C(7)-C(16)-C(17)  | 110.2(4)   |

|                   |          |                   |          |
|-------------------|----------|-------------------|----------|
| C(7)-C(16)-C(15)  | 111.7(4) | C(35)-C(36)-C(45) | 123.4(4) |
| C(17)-C(16)-C(15) | 109.2(4) | C(38)-C(37)-C(36) | 121.4(4) |
| C(19)-C(18)-C(23) | 120.8(4) | C(37)-C(38)-C(39) | 120.1(4) |
| C(19)-C(18)-N(2)  | 118.8(4) | C(38)-C(39)-C(40) | 121.1(4) |
| C(23)-C(18)-N(2)  | 120.3(4) | C(39)-C(40)-C(35) | 118.1(4) |
| C(20)-C(19)-C(18) | 118.4(4) | C(39)-C(40)-C(42) | 120.5(4) |
| C(20)-C(19)-C(28) | 120.5(4) | C(35)-C(40)-C(42) | 121.4(4) |
| C(18)-C(19)-C(28) | 121.1(4) | C(43)-C(42)-C(40) | 113.6(4) |
| C(19)-C(20)-C(21) | 121.8(4) | C(43)-C(42)-C(41) | 110.0(4) |
| C(22)-C(21)-C(20) | 118.9(4) | C(40)-C(42)-C(41) | 111.9(4) |
| C(21)-C(22)-C(23) | 122.1(4) | C(36)-C(45)-C(44) | 111.9(4) |
| C(22)-C(23)-C(18) | 118.0(4) | C(36)-C(45)-C(46) | 110.2(4) |
| C(22)-C(23)-C(25) | 119.5(4) | C(44)-C(45)-C(46) | 109.7(4) |
| C(18)-C(23)-C(25) | 122.5(4) | C(48)-C(47)-C(52) | 120.7(4) |
| C(23)-C(25)-C(24) | 113.0(4) | C(48)-C(47)-N(6)  | 120.4(4) |
| C(23)-C(25)-C(26) | 109.8(4) | C(52)-C(47)-N(6)  | 118.9(4) |
| C(24)-C(25)-C(26) | 109.6(4) | C(49)-C(48)-C(47) | 118.9(4) |
| C(19)-C(28)-C(27) | 111.3(4) | C(49)-C(48)-C(57) | 119.4(4) |
| C(19)-C(28)-C(29) | 113.1(4) | C(47)-C(48)-C(57) | 121.7(4) |
| C(27)-C(28)-C(29) | 109.9(4) | C(50)-C(49)-C(48) | 120.6(4) |
| N(5)-C(31)-C(32)  | 122.9(4) | C(51)-C(50)-C(49) | 120.5(4) |
| N(5)-C(31)-C(30)  | 119.9(4) | C(50)-C(51)-C(52) | 121.1(4) |
| C(32)-C(31)-C(30) | 117.2(4) | C(51)-C(52)-C(47) | 118.3(4) |
| C(33)-C(32)-C(31) | 127.3(4) | C(51)-C(52)-C(54) | 119.2(4) |
| N(6)-C(33)-C(32)  | 123.8(4) | C(47)-C(52)-C(54) | 122.5(4) |
| N(6)-C(33)-C(34)  | 118.9(4) | C(52)-C(54)-C(55) | 111.6(4) |
| C(32)-C(33)-C(34) | 117.3(4) | C(52)-C(54)-C(53) | 110.6(4) |
| C(40)-C(35)-C(36) | 121.3(4) | C(55)-C(54)-C(53) | 109.6(4) |
| C(40)-C(35)-N(5)  | 118.3(4) | C(48)-C(57)-C(58) | 110.3(4) |
| C(36)-C(35)-N(5)  | 120.2(4) | C(48)-C(57)-C(56) | 111.3(4) |
| C(37)-C(36)-C(35) | 117.9(4) | C(58)-C(57)-C(56) | 110.7(4) |
| C(37)-C(36)-C(45) | 118.8(4) |                   |          |

**Table S2.** Bond lengths (Å) and angles (deg) for [Fe(NO)Br(Ar-nacnac)], **4**.

|              |            |                    |            |
|--------------|------------|--------------------|------------|
| Fe(1)-N(1A)  | 1.613(8)   | C(25)-C(26)        | 1.394(4)   |
| Fe(1)-N(1)   | 1.644(5)   | C(26)-C(261)       | 1.516(4)   |
| Fe(1)-N(3)   | 1.938(2)   | C(121)-C(122)      | 1.527(5)   |
| Fe(1)-N(2)   | 1.971(2)   | C(121)-C(123)      | 1.532(5)   |
| Fe(1)-Br(1)  | 2.4136(9)  | C(161)-C(163)      | 1.528(5)   |
| Fe(1)-Br(1A) | 2.4544(17) | C(161)-C(162)      | 1.533(4)   |
| N(1)-O(1)    | 1.217(6)   | C(221)-C(223)      | 1.520(4)   |
| N(1A)-O(1A)  | 1.238(9)   | C(221)-C(222)      | 1.530(5)   |
| N(2)-C(4)    | 1.327(4)   | C(261)-C(262)      | 1.534(4)   |
| N(2)-C(21)   | 1.449(3)   | C(261)-C(263)      | 1.538(4)   |
| N(3)-C(2)    | 1.342(4)   |                    |            |
| N(3)-C(11)   | 1.450(3)   | N(1A)-Fe(1)-N(1)   | 110.5(3)   |
| C(1)-C(2)    | 1.507(4)   | N(1A)-Fe(1)-N(3)   | 110.3(3)   |
| C(2)-C(3)    | 1.397(4)   | N(1)-Fe(1)-N(3)    | 112.24(16) |
| C(3)-C(4)    | 1.407(4)   | N(1A)-Fe(1)-N(2)   | 109.1(3)   |
| C(4)-C(5)    | 1.512(4)   | N(1)-Fe(1)-N(2)    | 117.38(15) |
| C(11)-C(16)  | 1.402(4)   | N(3)-Fe(1)-N(2)    | 96.49(10)  |
| C(11)-C(12)  | 1.408(4)   | N(1A)-Fe(1)-Br(1)  | 5.0(3)     |
| C(12)-C(13)  | 1.395(4)   | N(1)-Fe(1)-Br(1)   | 115.22(15) |
| C(12)-C(121) | 1.520(4)   | N(3)-Fe(1)-Br(1)   | 106.11(7)  |
| C(13)-C(14)  | 1.382(5)   | N(2)-Fe(1)-Br(1)   | 107.35(7)  |
| C(14)-C(15)  | 1.383(5)   | N(1A)-Fe(1)-Br(1A) | 115.6(3)   |
| C(15)-C(16)  | 1.397(4)   | N(1)-Fe(1)-Br(1A)  | 5.17(15)   |
| C(16)-C(161) | 1.515(4)   | N(3)-Fe(1)-Br(1A)  | 108.77(8)  |
| C(21)-C(22)  | 1.405(4)   | N(2)-Fe(1)-Br(1A)  | 114.85(8)  |
| C(21)-C(26)  | 1.406(4)   | Br(1)-Fe(1)-Br(1A) | 120.31(4)  |
| C(22)-C(23)  | 1.389(4)   | O(1)-N(1)-Fe(1)    | 175.5(6)   |
| C(22)-C(221) | 1.520(4)   | O(1A)-N(1A)-Fe(1)  | 162.4(12)  |
| C(23)-C(24)  | 1.383(4)   | C(4)-N(2)-C(21)    | 120.6(2)   |
| C(24)-C(25)  | 1.376(4)   | C(4)-N(2)-Fe(1)    | 116.76(19) |



|                    |            |                      |          |
|--------------------|------------|----------------------|----------|
| C(21)-N(2)-Fe(1)   | 121.57(17) | C(22)-C(21)-N(2)     | 118.5(2) |
| C(2)-N(3)-C(11)    | 118.7(2)   | C(26)-C(21)-N(2)     | 119.9(2) |
| C(2)-N(3)-Fe(1)    | 116.36(18) | C(23)-C(22)-C(21)    | 118.1(3) |
| C(11)-N(3)-Fe(1)   | 124.80(18) | C(23)-C(22)-C(221)   | 119.9(3) |
| N(3)-C(2)-C(3)     | 122.9(3)   | C(21)-C(22)-C(221)   | 121.9(3) |
| N(3)-C(2)-C(1)     | 119.2(3)   | C(24)-C(23)-C(22)    | 121.1(3) |
| C(3)-C(2)-C(1)     | 117.9(3)   | C(25)-C(24)-C(23)    | 120.0(3) |
| C(2)-C(3)-C(4)     | 129.1(3)   | C(24)-C(25)-C(26)    | 121.5(3) |
| N(2)-C(4)-C(3)     | 123.4(3)   | C(25)-C(26)-C(21)    | 117.7(3) |
| N(2)-C(4)-C(5)     | 120.4(3)   | C(25)-C(26)-C(261)   | 118.6(3) |
| C(3)-C(4)-C(5)     | 116.1(2)   | C(21)-C(26)-C(261)   | 123.6(2) |
| C(16)-C(11)-C(12)  | 121.5(3)   | C(12)-C(121)-C(122)  | 112.4(3) |
| C(16)-C(11)-N(3)   | 120.8(2)   | C(12)-C(121)-C(123)  | 109.9(3) |
| C(12)-C(11)-N(3)   | 117.6(2)   | C(122)-C(121)-C(123) | 110.0(3) |
| C(13)-C(12)-C(11)  | 118.1(3)   | C(16)-C(161)-C(163)  | 112.2(3) |
| C(13)-C(12)-C(121) | 119.7(3)   | C(16)-C(161)-C(162)  | 110.6(3) |
| C(11)-C(12)-C(121) | 122.2(3)   | C(163)-C(161)-C(162) | 109.9(3) |
| C(14)-C(13)-C(12)  | 121.1(3)   | C(223)-C(221)-C(22)  | 113.3(3) |
| C(13)-C(14)-C(15)  | 120.0(3)   | C(223)-C(221)-C(222) | 111.0(3) |
| C(14)-C(15)-C(16)  | 121.2(3)   | C(22)-C(221)-C(222)  | 110.1(3) |
| C(15)-C(16)-C(11)  | 118.0(30)  | C(26)-C(261)-C(262)  | 112.6(2) |
| C(15)-C(16)-C(161) | 119.6(3)   | C(26)-C(261)-C(263)  | 110.0(2) |
| C(11)-C(16)-C(161) | 122.4(3)   | C(262)-C(261)-C(263) | 109.4(3) |
| C(22)-C(21)-C(26)  | 121.5(2)   |                      |          |

**Table S3.** Bond lengths (Å) and angles (deg) for [Fe(THF)Br(Ar-nacnac)], **5**.

|             |           |                   |            |
|-------------|-----------|-------------------|------------|
| Br(1)-Fe(1) | 2.4114(6) | C(7)-C(16)        | 1.528(6)   |
| Fe(1)-N(2)  | 1.998(3)  | C(22)-C(21)       | 1.388(6)   |
| Fe(1)-N(1)  | 2.009(3)  | C(13)-C(12)       | 1.532(6)   |
| Fe(1)-O(1)  | 2.061(2)  | C(13)-C(14)       | 1.541(6)   |
| N(2)-C(4)   | 1.337(4)  | C(16)-C(15)       | 1.521(7)   |
| N(2)-C(6)   | 1.444(4)  | C(16)-C(17)       | 1.532(6)   |
| O(1)-C(33)  | 1.453(4)  | C(32)-C(31)       | 1.522(7)   |
| O(1)-C(30)  | 1.460(5)  | C(8)-C(9)         | 1.379(7)   |
| C(19)-C(20) | 1.401(5)  | C(21)-C(20)       | 1.369(6)   |
| C(19)-C(18) | 1.405(5)  | C(10)-C(9)        | 1.376(6)   |
| C(19)-C(25) | 1.514(5)  | C(30)-C(31)       | 1.515(6)   |
| C(4)-C(3)   | 1.397(5)  |                   |            |
| C(4)-C(5)   | 1.515(5)  | N(2)-Fe(1)-N(1)   | 94.01(11)  |
| N(1)-C(2)   | 1.331(4)  | N(2)-Fe(1)-O(1)   | 114.51(11) |
| N(1)-C(18)  | 1.444(4)  | N(1)-Fe(1)-O(1)   | 109.99(11) |
| C(18)-C(23) | 1.410(5)  | N(2)-Fe(1)-Br(1)  | 119.67(8)  |
| C(2)-C(3)   | 1.408(5)  | N(1)-Fe(1)-Br(1)  | 121.06(8)  |
| C(2)-C(1)   | 1.512(5)  | O(1)-Fe(1)-Br(1)  | 98.45(7)   |
| C(11)-C(10) | 1.406(5)  | C(4)-N(2)-C(6)    | 118.7(3)   |
| C(11)-C(6)  | 1.408(5)  | C(4)-N(2)-Fe(1)   | 120.6(2)   |
| C(11)-C(13) | 1.506(6)  | C(6)-N(2)-Fe(1)   | 120.7(2)   |
| C(23)-C(22) | 1.395(5)  | C(33)-O(1)-C(30)  | 106.7(3)   |
| C(23)-C(28) | 1.526(5)  | C(33)-O(1)-Fe(1)  | 122.5(2)   |
| C(33)-C(32) | 1.519(6)  | C(30)-O(1)-Fe(1)  | 120.4(2)   |
| C(28)-C(29) | 1.527(6)  | C(20)-C(19)-C(18) | 118.2(3)   |
| C(28)-C(27) | 1.537(6)  | C(20)-C(19)-C(25) | 118.9(3)   |
| C(25)-C(26) | 1.530(6)  | C(18)-C(19)-C(25) | 122.8(3)   |
| C(25)-C(24) | 1.536(6)  | N(2)-C(4)-C(3)    | 123.6(3)   |
| C(6)-C(7)   | 1.412(5)  | N(2)-C(4)-C(5)    | 119.9(3)   |
| C(7)-C(8)   | 1.390(5)  | C(3)-C(4)-C(5)    | 116.5(3)   |

|                   |          |                   |          |
|-------------------|----------|-------------------|----------|
| C(2)-N(1)-C(18)   | 119.8(3) | C(26)-C(25)-C(24) | 109.4(3) |
| C(2)-N(1)-Fe(1)   | 120.5(2) | C(11)-C(6)-C(7)   | 121.1(3) |
| C(18)-N(1)-Fe(1)  | 119.4(2) | C(11)-C(6)-N(2)   | 120.8(3) |
| C(19)-C(18)-C(23) | 121.0(3) | C(7)-C(6)-N(2)    | 118.0(3) |
| C(19)-C(18)-N(1)  | 120.5(3) | C(8)-C(7)-C(6)    | 118.6(4) |
| C(23)-C(18)-N(1)  | 118.4(3) | C(8)-C(7)-C(16)   | 120.0(4) |
| N(1)-C(2)-C(3)    | 123.8(3) | C(6)-C(7)-C(16)   | 121.4(3) |
| N(1)-C(2)-C(1)    | 120.5(3) | C(21)-C(22)-C(23) | 121.3(4) |
| C(3)-C(2)-C(1)    | 115.7(3) | C(11)-C(13)-C(12) | 110.8(4) |
| C(10)-C(11)-C(6)  | 117.6(4) | C(11)-C(13)-C(14) | 111.8(3) |
| C(10)-C(11)-C(13) | 119.7(3) | C(12)-C(13)-C(14) | 109.8(4) |
| C(6)-C(11)-C(13)  | 122.8(3) | C(15)-C(16)-C(7)  | 112.1(4) |
| C(4)-C(3)-C(2)    | 128.9(3) | C(15)-C(16)-C(17) | 110.0(4) |
| C(22)-C(23)-C(18) | 118.1(3) | C(7)-C(16)-C(17)  | 112.1(4) |
| C(22)-C(23)-C(28) | 120.3(3) | C(33)-C(32)-C(31) | 102.8(4) |
| C(18)-C(23)-C(28) | 121.6(3) | C(9)-C(8)-C(7)    | 121.1(4) |
| O(1)-C(33)-C(32)  | 102.7(3) | C(20)-C(21)-C(22) | 119.9(4) |
| C(23)-C(28)-C(29) | 111.7(3) | C(9)-C(10)-C(11)  | 121.5(4) |
| C(23)-C(28)-C(27) | 113.7(3) | O(1)-C(30)-C(31)  | 106.2(4) |
| C(29)-C(28)-C(27) | 108.9(4) | C(21)-C(20)-C(19) | 121.5(4) |
| C(19)-C(25)-C(26) | 111.1(3) | C(10)-C(9)-C(8)   | 120.2(4) |
| C(19)-C(25)-C(24) | 112.0(3) | C(30)-C(31)-C(32) | 105.2(4) |

**Table S4.** Bond lengths (Å) and angles (deg) for [FeBr<sub>2</sub>(Ar-nacnac)], **6**.

|             |            |                   |             |
|-------------|------------|-------------------|-------------|
| Br(1)-Fe(1) | 2.3446(3)  | C(22)-C(23)       | 1.396(2)    |
| Fe(1)-N(1)  | 1.9459(13) | C(23)-C(25)       | 1.520(2)    |
| Fe(1)-N(2)  | 1.9730(13) | C(24)-C(25)       | 1.528(2)    |
| Fe(1)-Br(2) | 2.3188(3)  | C(25)-C(26)       | 1.538(2)    |
| N(1)-C(2)   | 1.342(2)   | C(27)-C(28)       | 1.529(2)    |
| N(1)-C(6)   | 1.4466(19) | C(28)-C(29)       | 1.528(2)    |
| C(1)-C(2)   | 1.507(2)   |                   |             |
| N(2)-C(4)   | 1.333(2)   | N(1)-Fe(1)-N(2)   | 96.36(5)    |
| N(2)-C(18)  | 1.450(2)   | N(1)-Fe(1)-Br(2)  | 112.39(4)   |
| C(2)-C(3)   | 1.401(2)   | N(2)-Fe(1)-Br(2)  | 116.18(4)   |
| C(3)-C(4)   | 1.412(2)   | N(1)-Fe(1)-Br(1)  | 107.08(4)   |
| C(4)-C(5)   | 1.508(2)   | N(2)-Fe(1)-Br(1)  | 106.70(4)   |
| C(6)-C(7)   | 1.406(2)   | Br(2)-Fe(1)-Br(1) | 116.068(11) |
| C(6)-C(11)  | 1.406(2)   | C(2)-N(1)-C(6)    | 118.67(13)  |
| C(7)-C(8)   | 1.396(2)   | C(2)-N(1)-Fe(1)   | 116.01(10)  |
| C(7)-C(16)  | 1.523(2)   | C(6)-N(1)-Fe(1)   | 125.14(10)  |
| C(8)-C(9)   | 1.381(3)   | C(4)-N(2)-C(18)   | 120.25(13)  |
| C(9)-C(10)  | 1.384(3)   | C(4)-N(2)-Fe(1)   | 116.77(10)  |
| C(10)-C(11) | 1.396(2)   | C(18)-N(2)-Fe(1)  | 121.96(10)  |
| C(11)-C(13) | 1.520(2)   | N(1)-C(2)-C(3)    | 122.92(14)  |
| C(12)-C(13) | 1.532(2)   | N(1)-C(2)-C(1)    | 119.48(14)  |
| C(13)-C(14) | 1.529(3)   | C(3)-C(2)-C(1)    | 117.57(15)  |
| C(15)-C(16) | 1.530(2)   | C(2)-C(3)-C(4)    | 129.09(15)  |
| C(16)-C(17) | 1.539(3)   | N(2)-C(4)-C(3)    | 123.06(15)  |
| C(18)-C(23) | 1.407(2)   | N(2)-C(4)-C(5)    | 120.73(14)  |
| C(18)-C(19) | 1.411(2)   | C(3)-C(4)-C(5)    | 116.20(14)  |
| C(19)-C(20) | 1.395(2)   | C(7)-C(6)-C(11)   | 121.62(15)  |
| C(19)-C(28) | 1.520(2)   | C(7)-C(6)-N(1)    | 120.86(14)  |
| C(20)-C(21) | 1.380(2)   | C(11)-C(6)-N(1)   | 117.52(14)  |
| C(21)-C(22) | 1.378(2)   | C(8)-C(7)-C(6)    | 117.95(15)  |

|                   |            |                   |            |
|-------------------|------------|-------------------|------------|
| C(8)-C(7)-C(16)   | 119.49(15) | C(19)-C(18)-N(2)  | 118.30(14) |
| C(6)-C(7)-C(16)   | 122.55(14) | C(20)-C(19)-C(18) | 117.80(15) |
| C(9)-C(8)-C(7)    | 121.18(16) | C(20)-C(19)-C(28) | 119.98(14) |
| C(8)-C(9)-C(10)   | 120.20(16) | C(18)-C(19)-C(28) | 122.16(14) |
| C(9)-C(10)-C(11)  | 120.97(16) | C(21)-C(20)-C(19) | 121.34(15) |
| C(10)-C(11)-C(6)  | 118.06(15) | C(22)-C(21)-C(20) | 120.09(15) |
| C(10)-C(11)-C(13) | 119.30(15) | C(21)-C(22)-C(23) | 121.39(15) |
| C(6)-C(11)-C(13)  | 122.63(14) | C(22)-C(23)-C(18) | 117.84(14) |
| C(11)-C(13)-C(14) | 112.35(14) | C(22)-C(23)-C(25) | 118.14(14) |
| C(11)-C(13)-C(12) | 110.16(15) | C(18)-C(23)-C(25) | 123.98(14) |
| C(14)-C(13)-C(12) | 110.24(15) | C(23)-C(25)-C(24) | 110.39(14) |
| C(7)-C(16)-C(15)  | 111.87(14) | C(23)-C(25)-C(26) | 112.31(14) |
| C(7)-C(16)-C(17)  | 110.64(14) | C(24)-C(25)-C(26) | 109.36(14) |
| C(15)-C(16)-C(17) | 109.99(15) | C(19)-C(28)-C(29) | 110.23(15) |
| C(23)-C(18)-C(19) | 121.51(14) | C(19)-C(28)-C(27) | 112.69(14) |
| C(23)-C(18)-N(2)  | 120.16(14) | C(29)-C(28)-C(27) | 110.66(15) |
